# Supplementary material for: Faecal microbiota transplantation halts progression of human new-onset type 1 diabetes in a randomised controlled trial
Source: HighWire-hosted journal article supplement (doi:10.1136/gutjnl-2020-322630), 2020-10-26

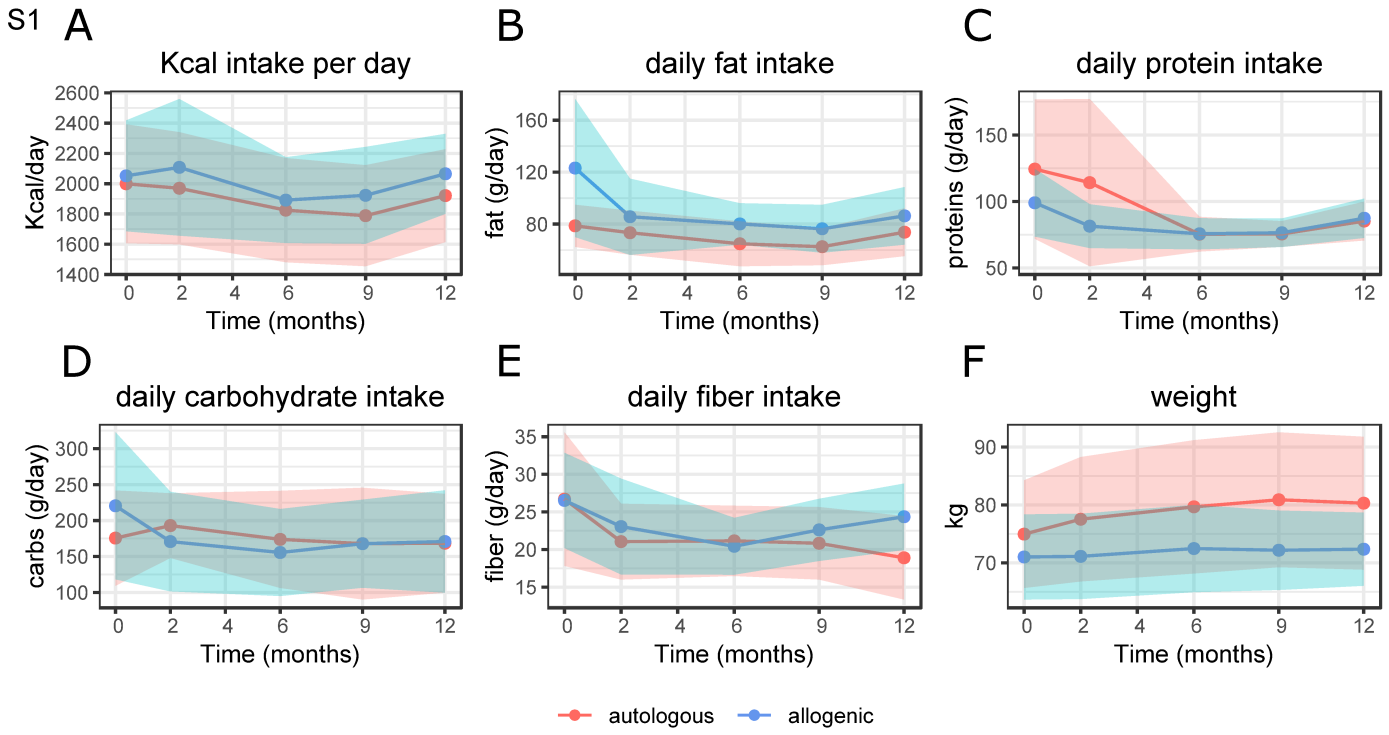

S2

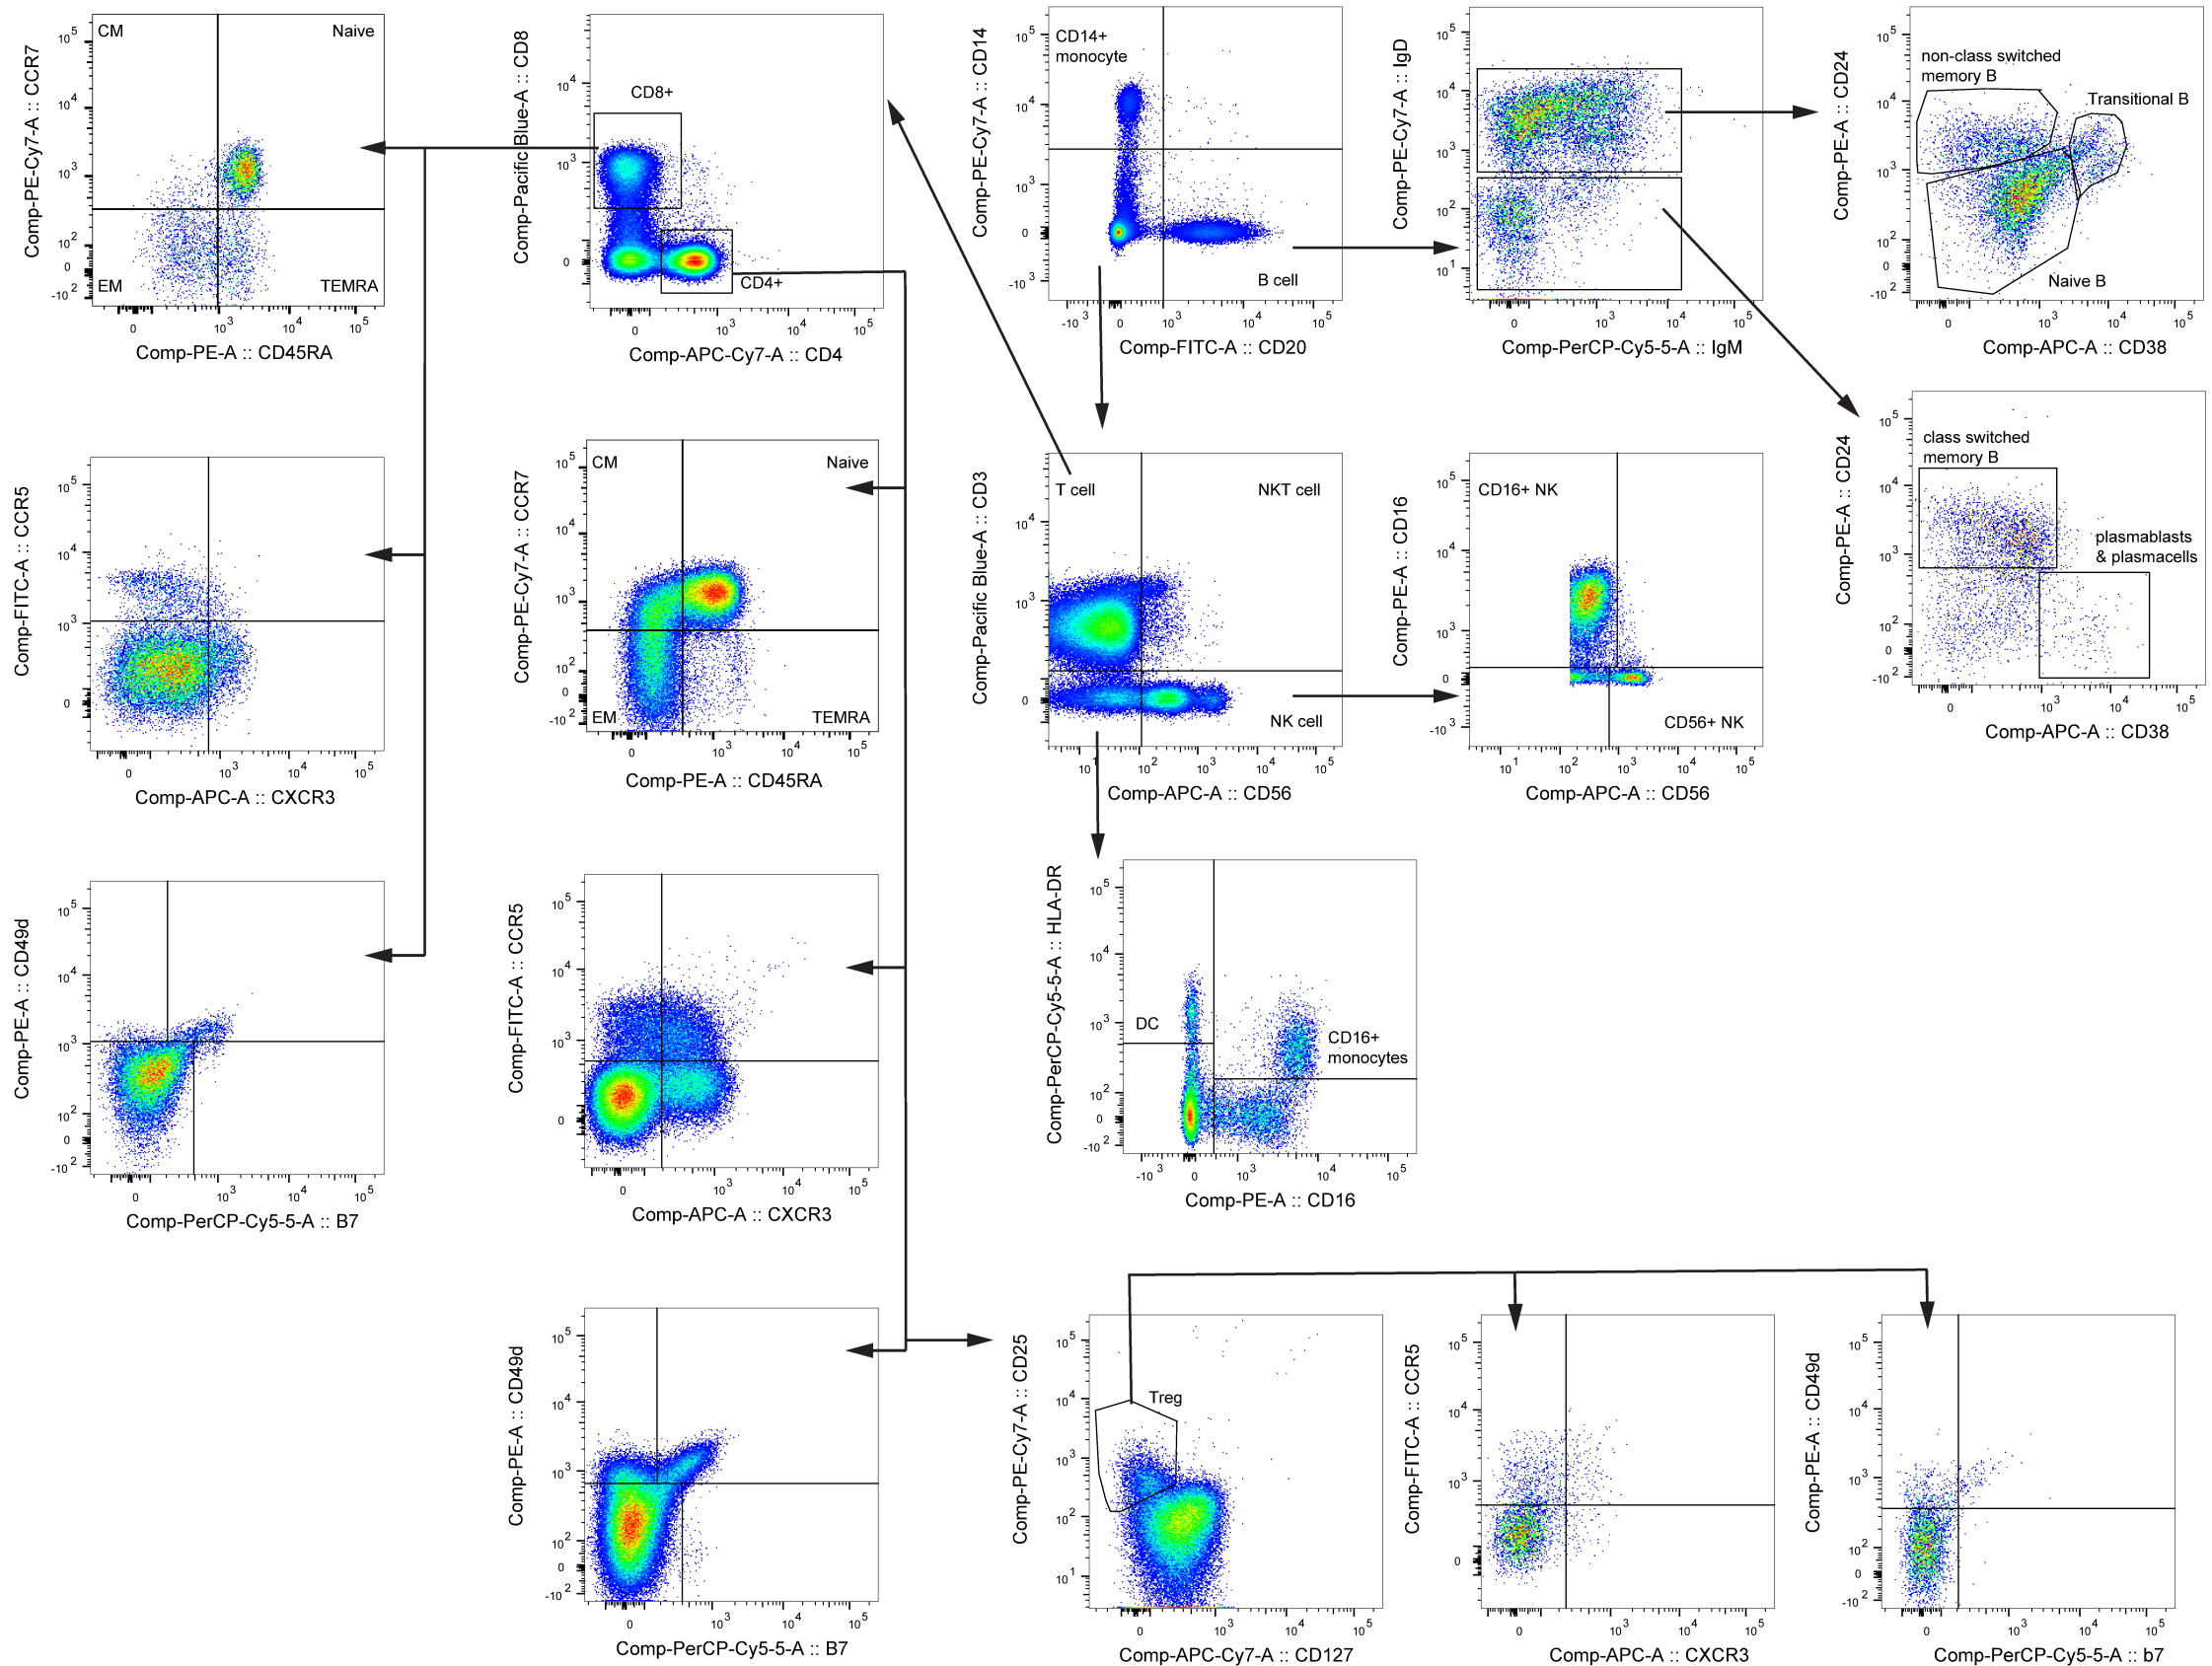

S3 A

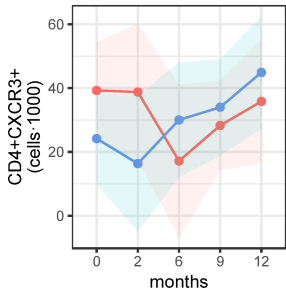

B

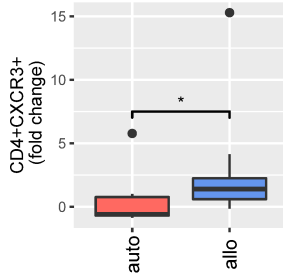

C

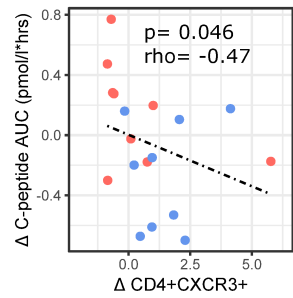

D

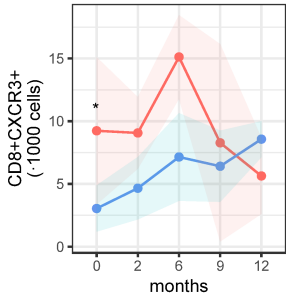

E

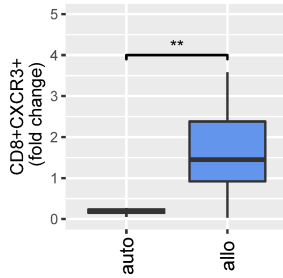

F

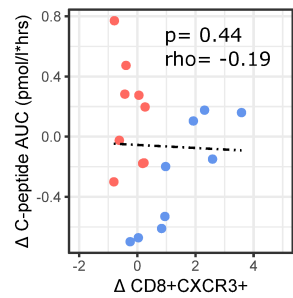

S4

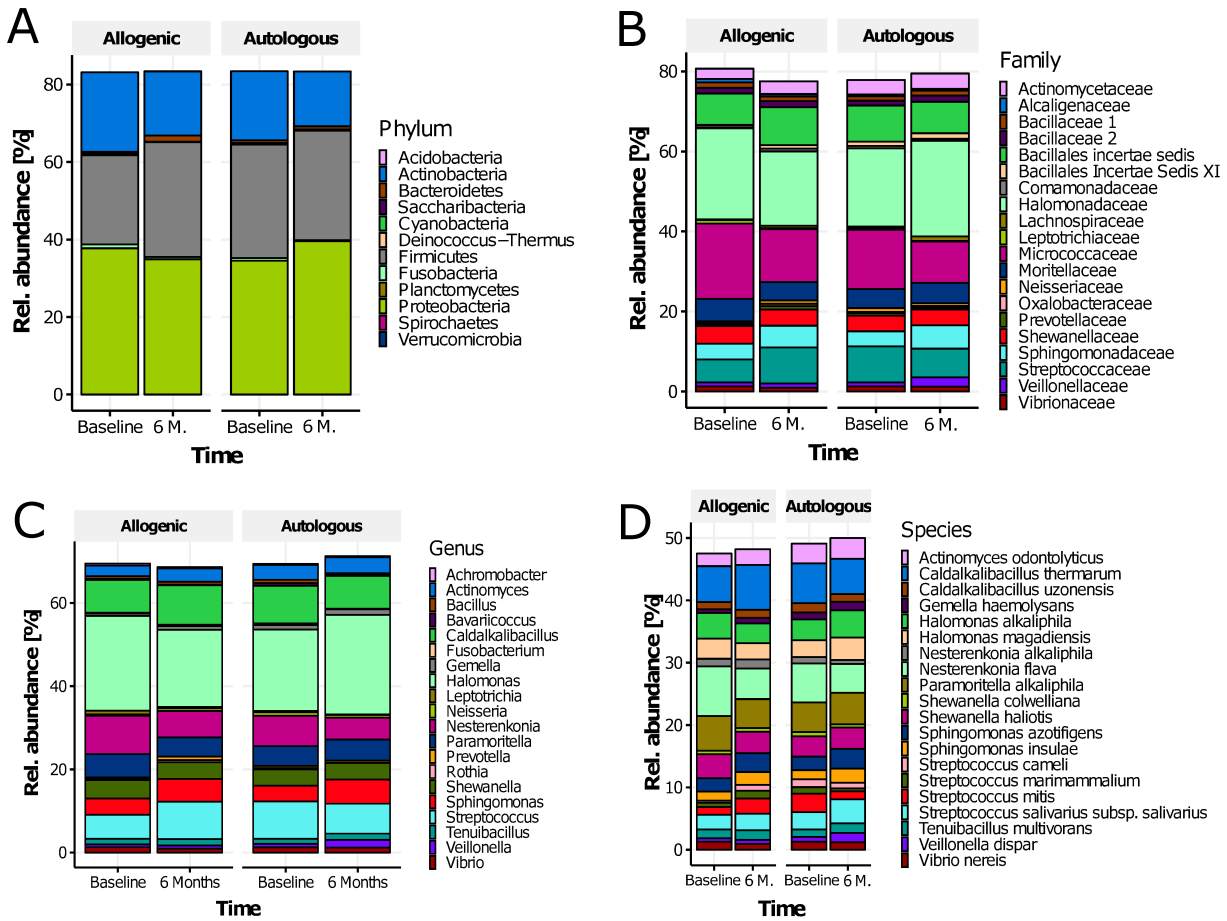

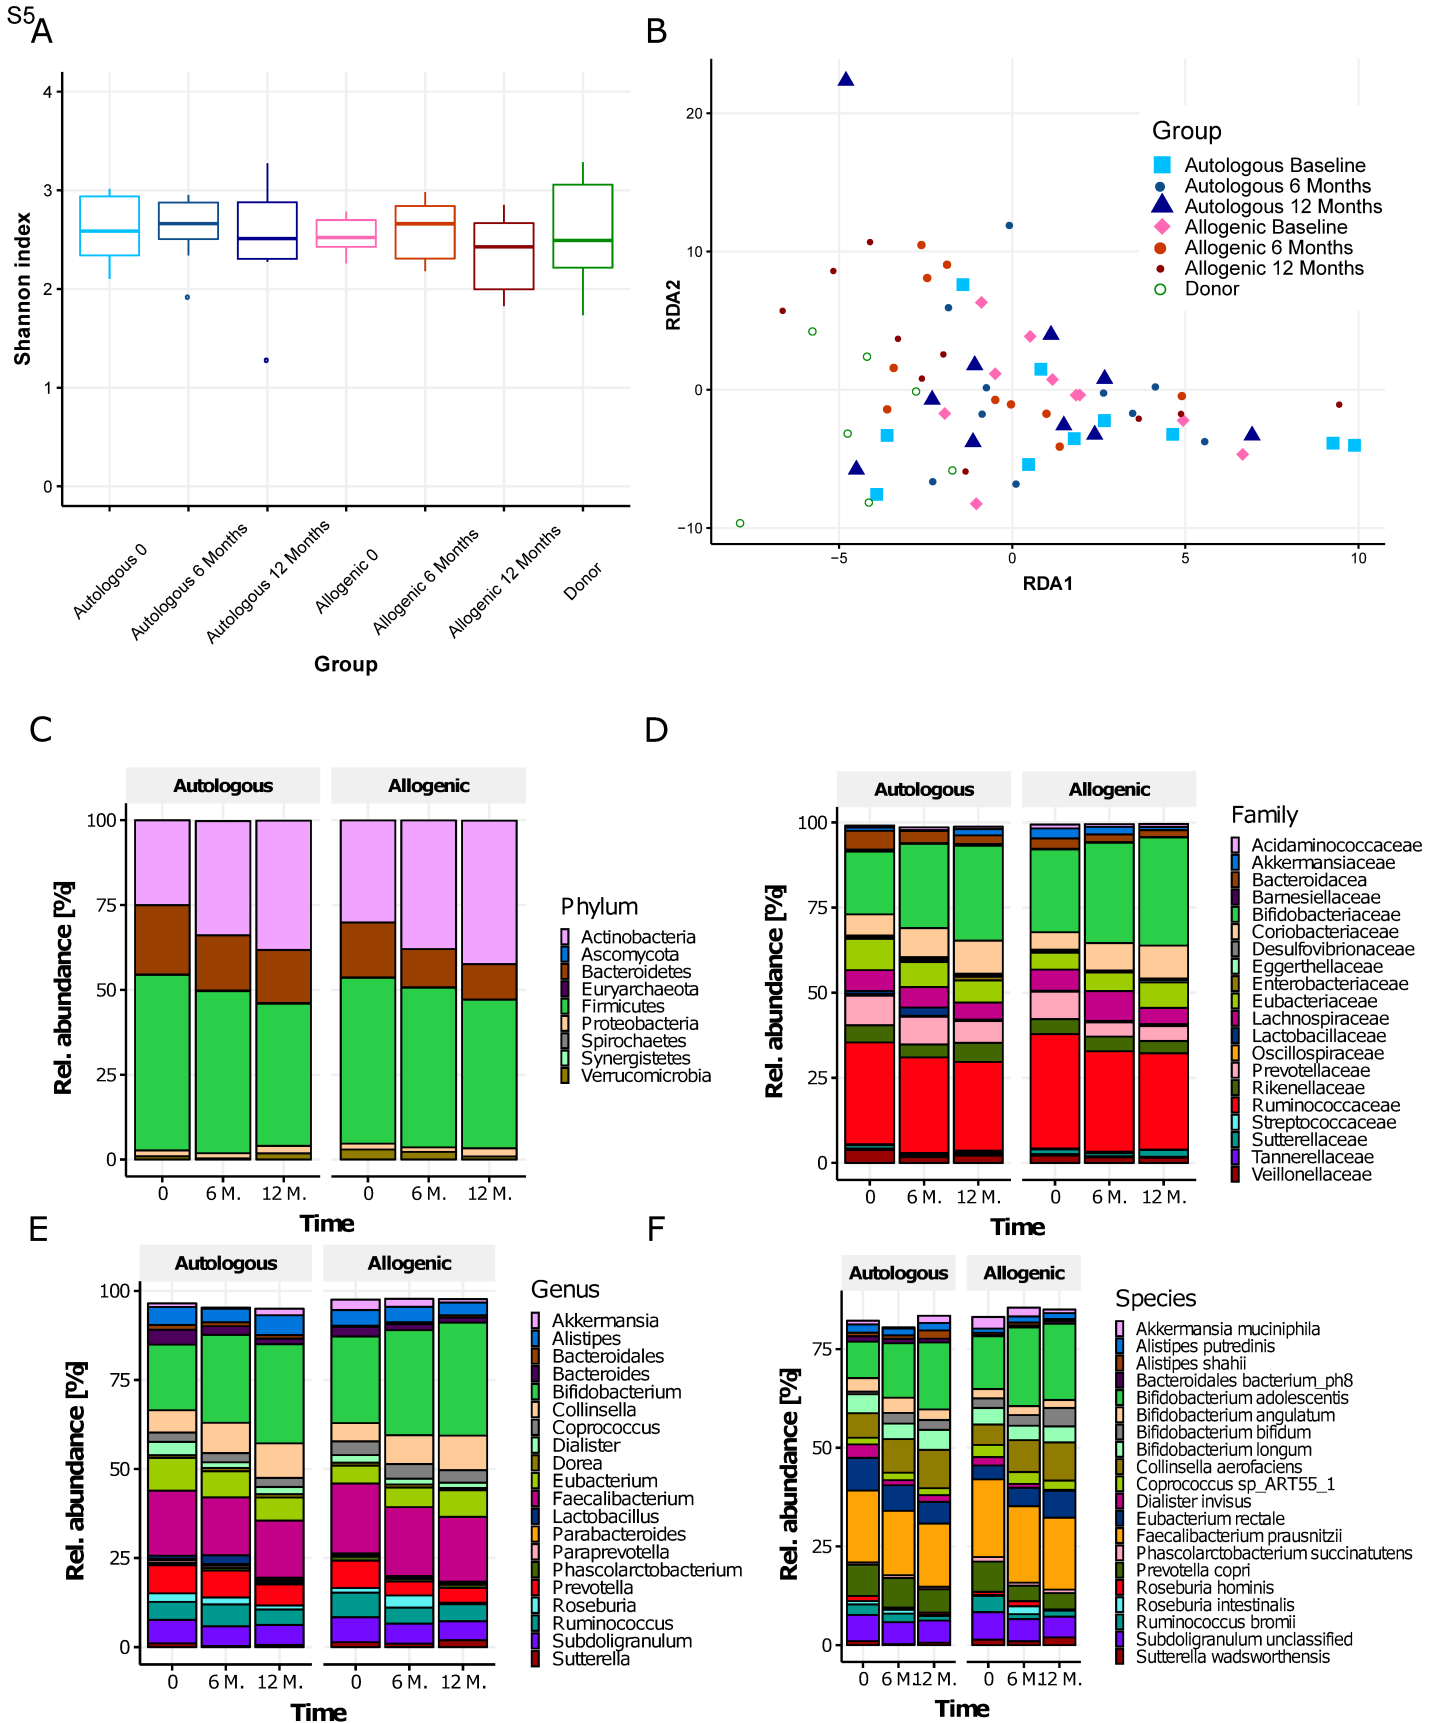

S6 A

Top 30 Relative Variable Importances

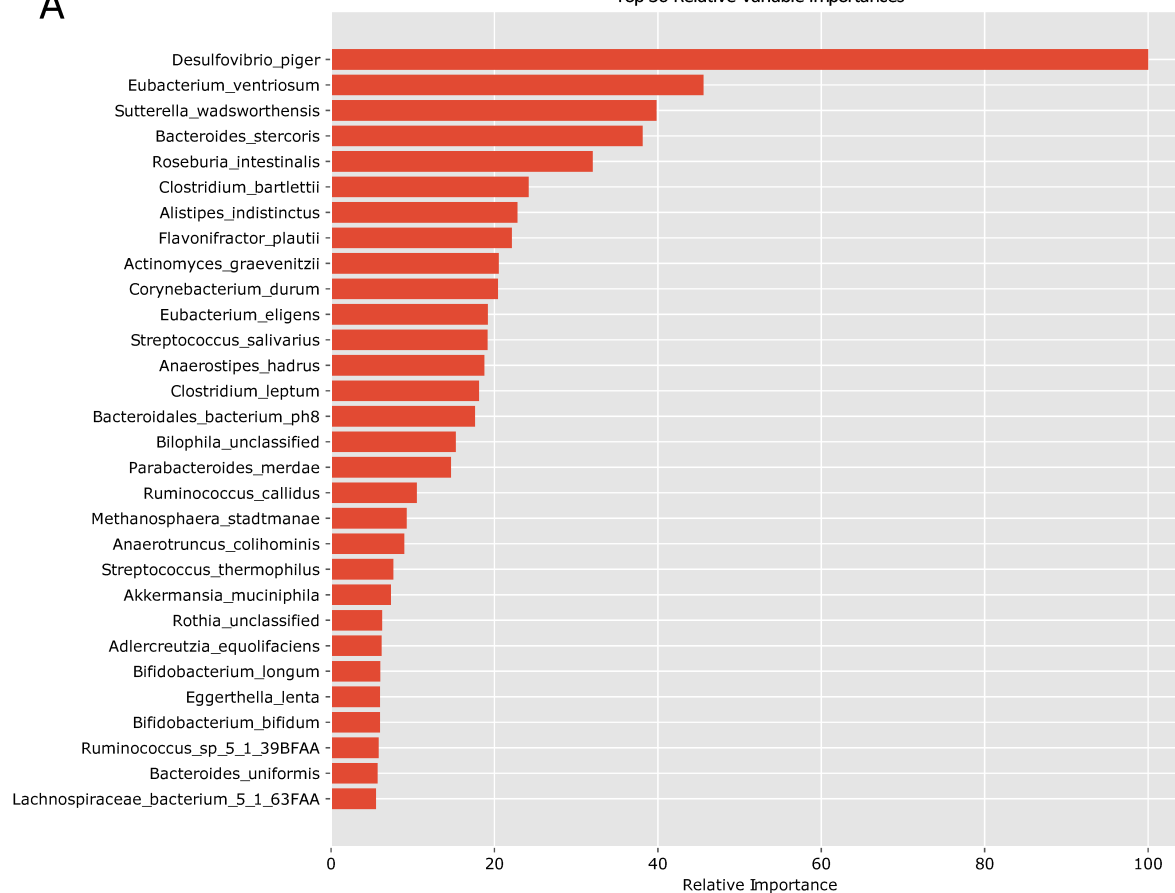

B

Top 30 Relative Variable Importances

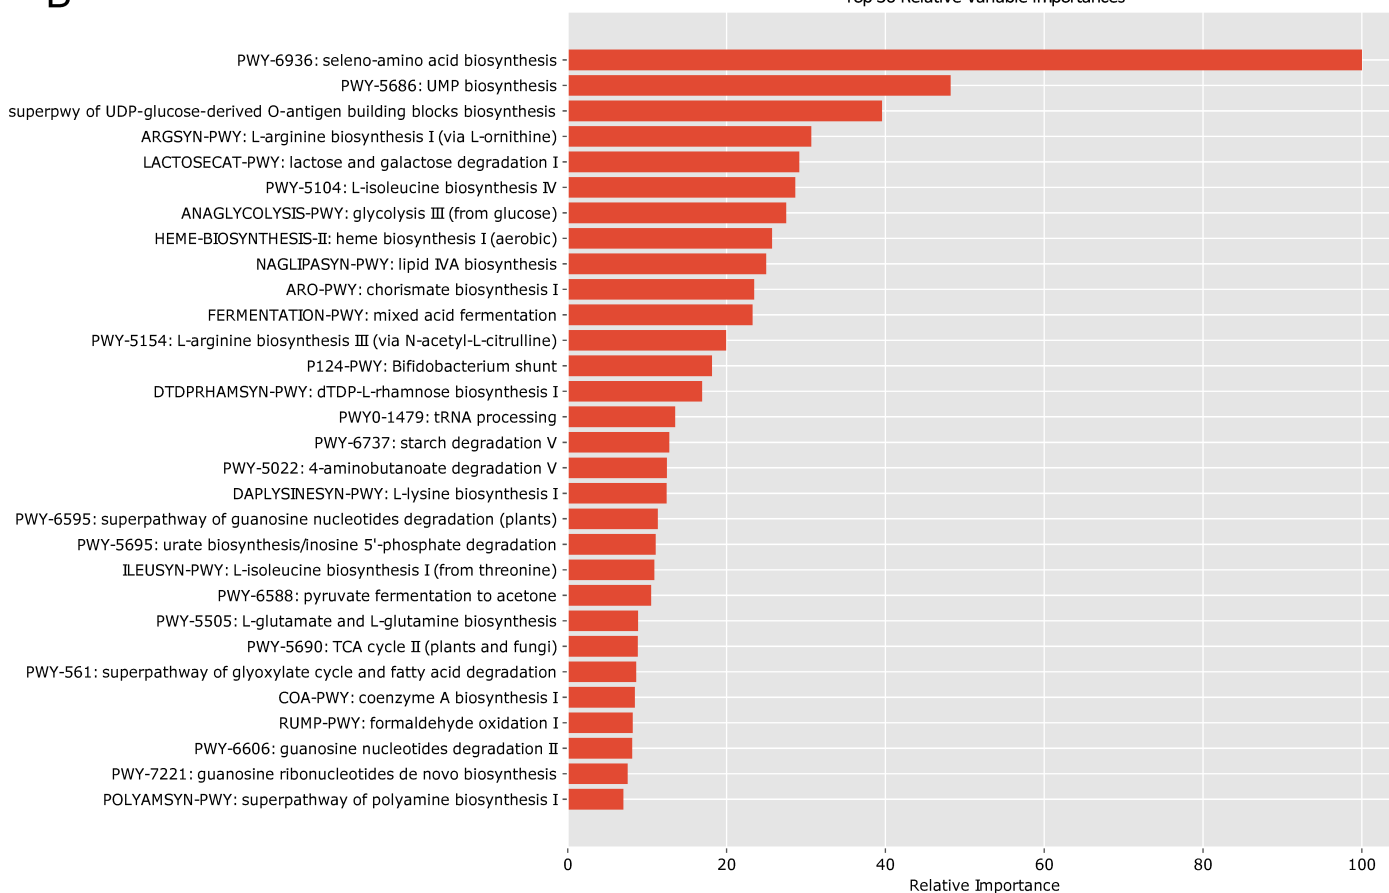

S7

Top 30 Relative Variable Importances

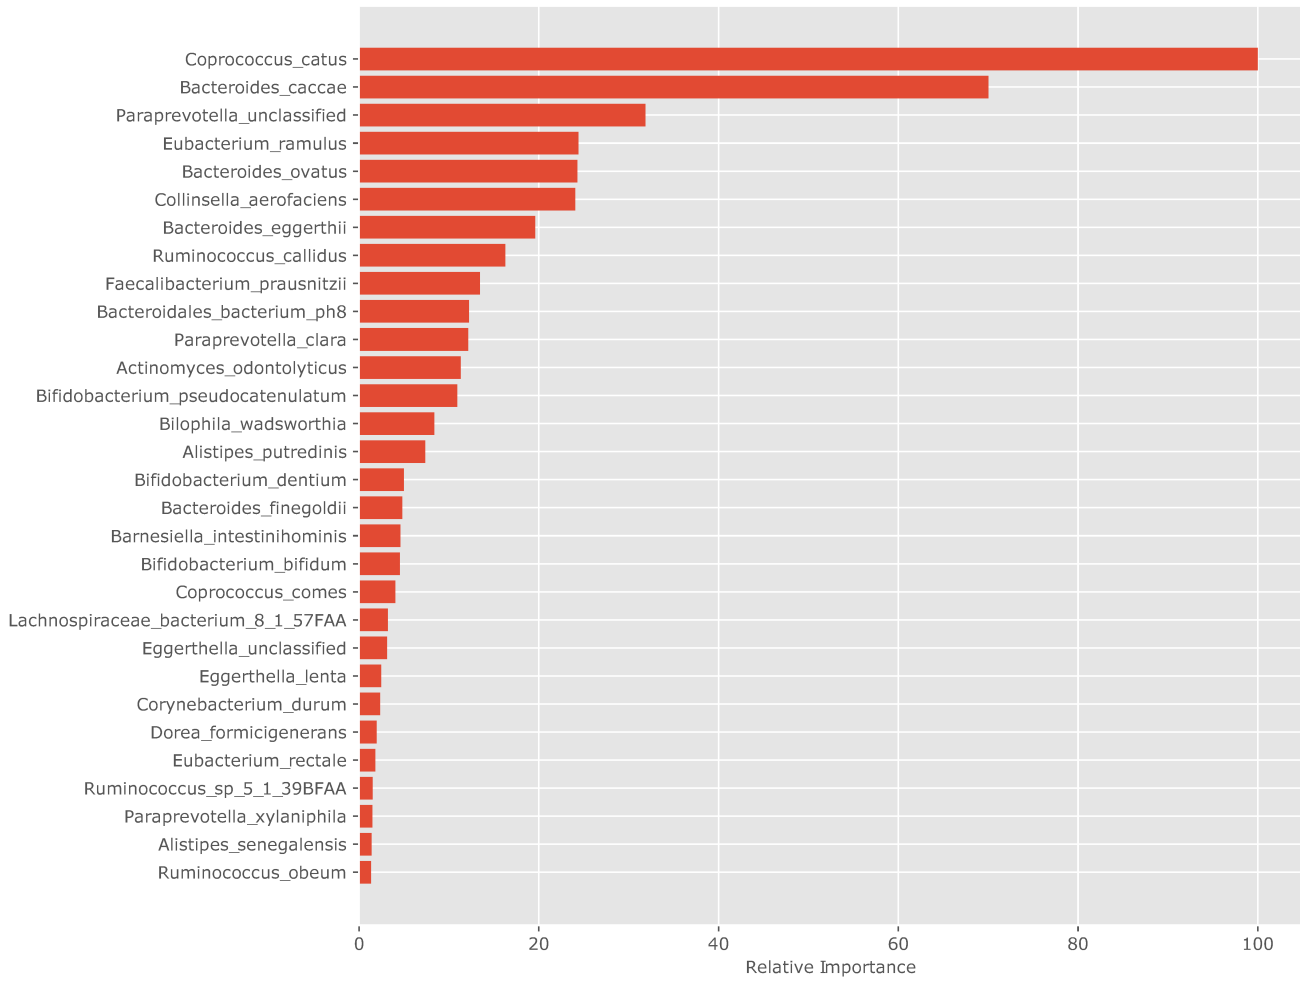

S8

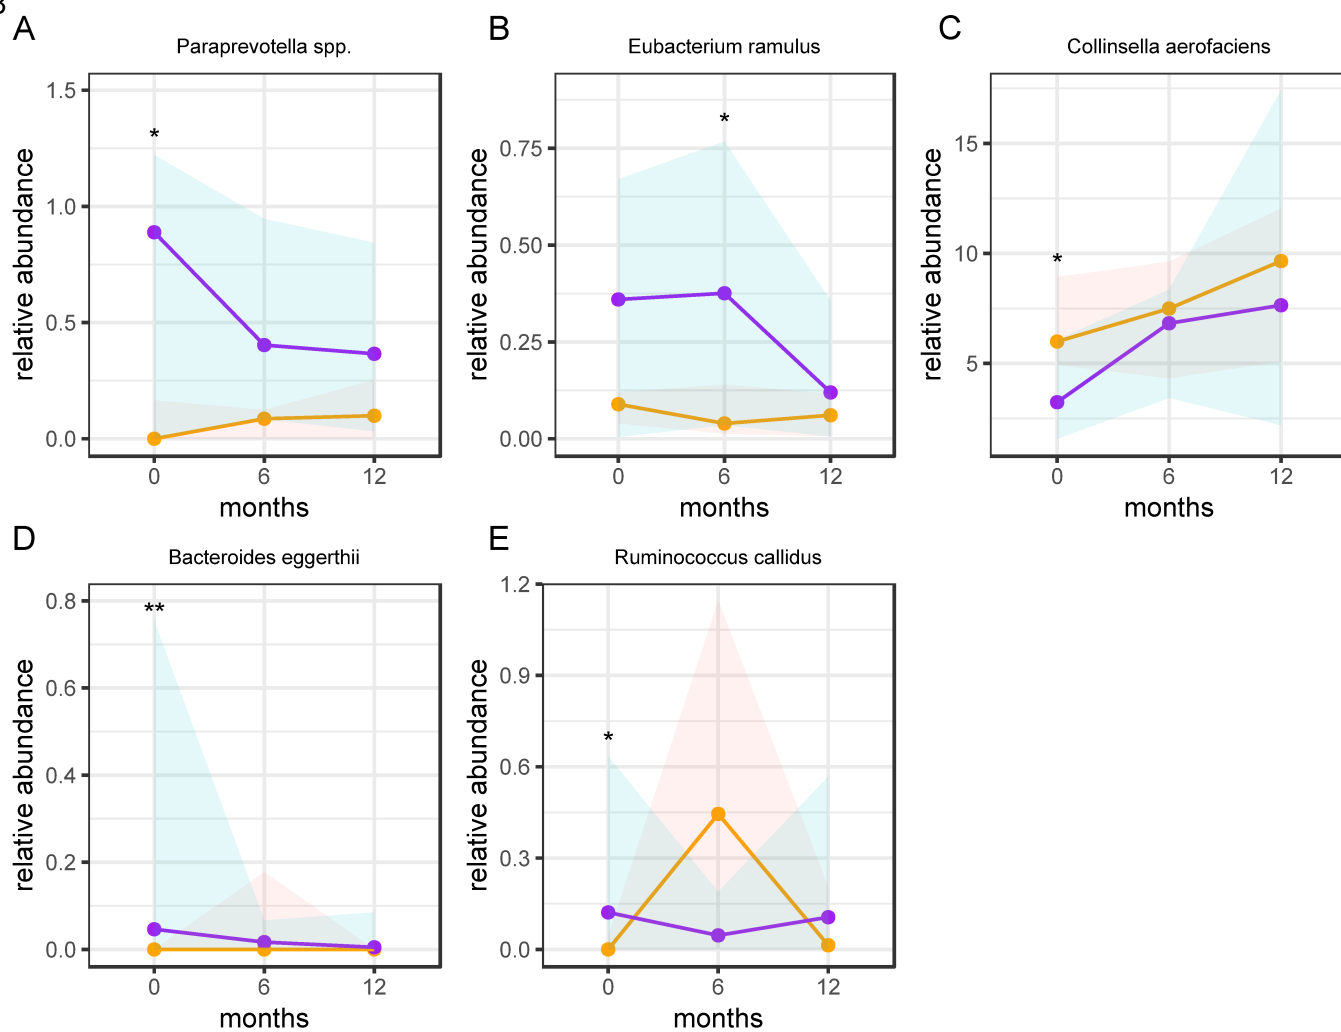



S9

A

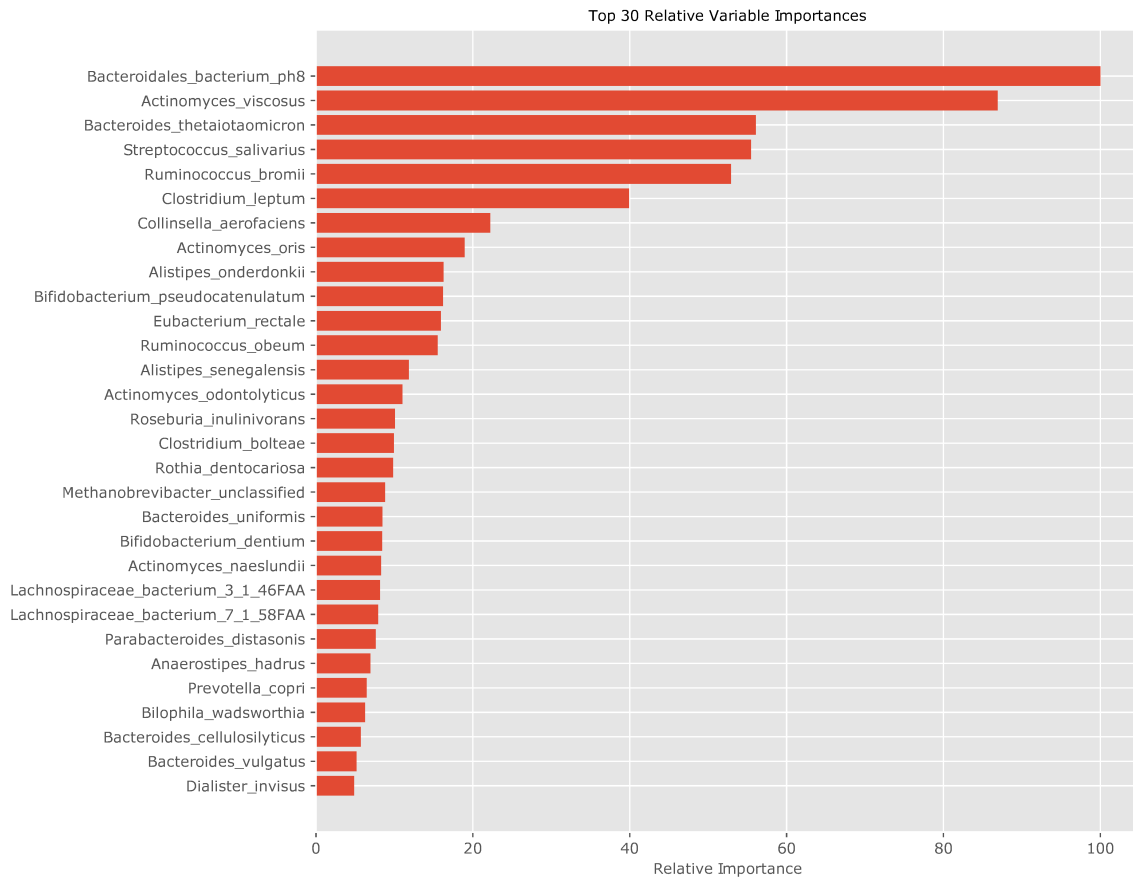

B

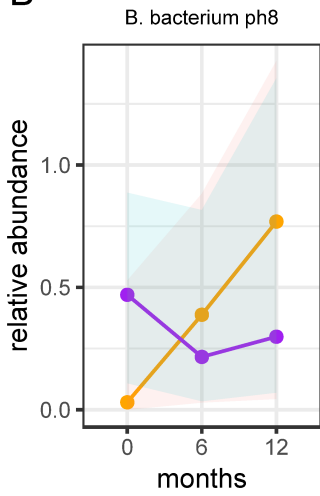

C

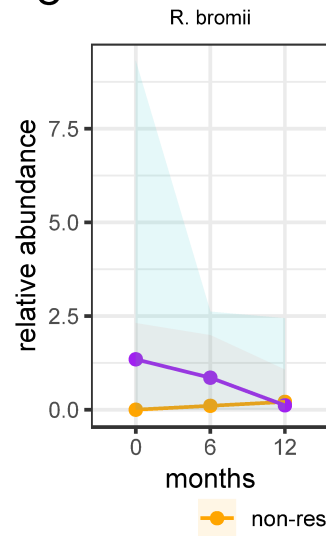

D

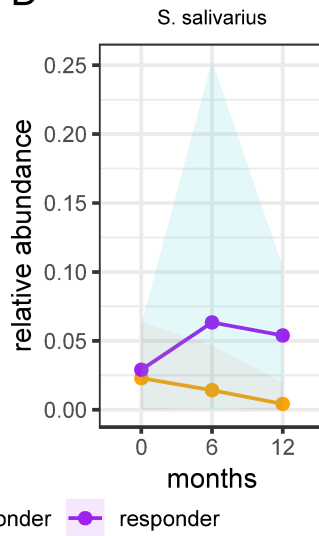

E

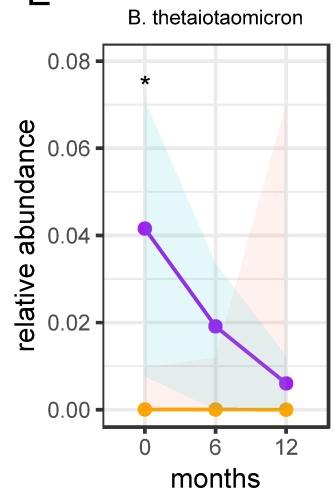

F

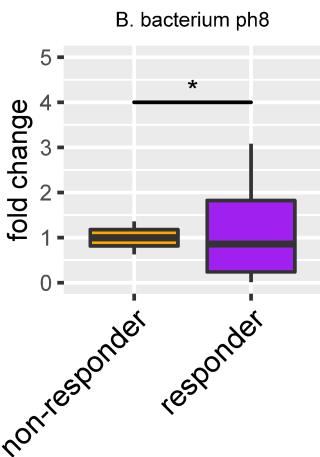

G

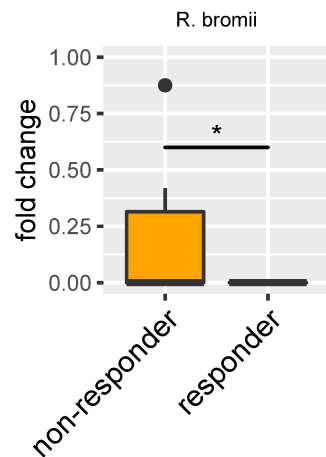

H

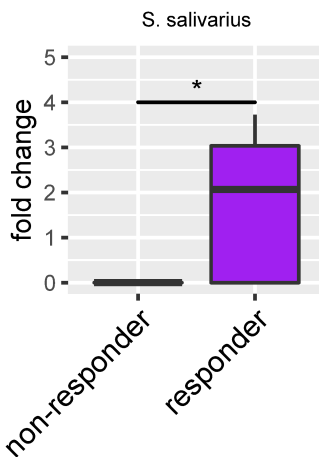

I

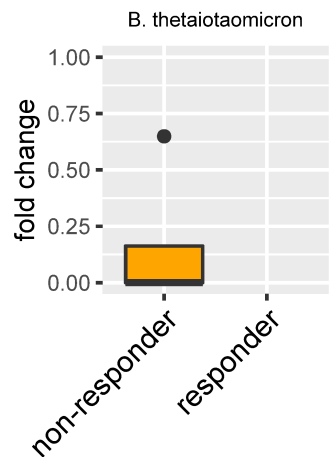

S10

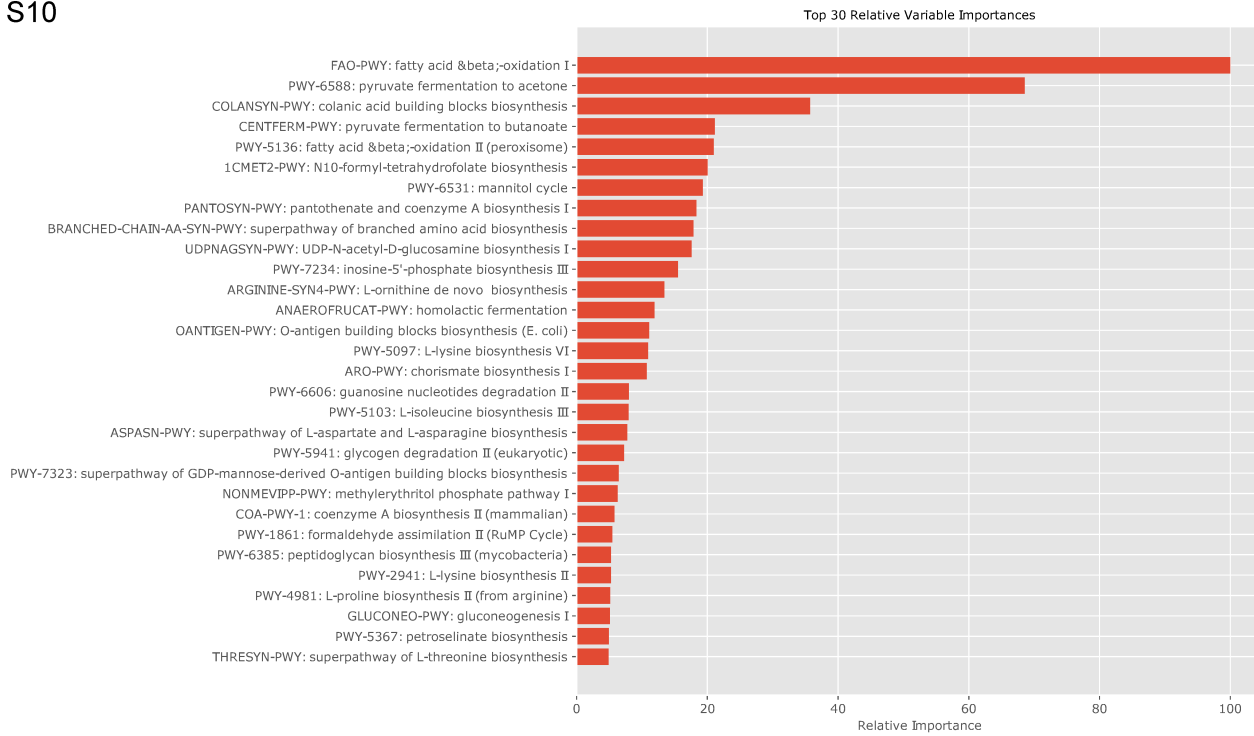

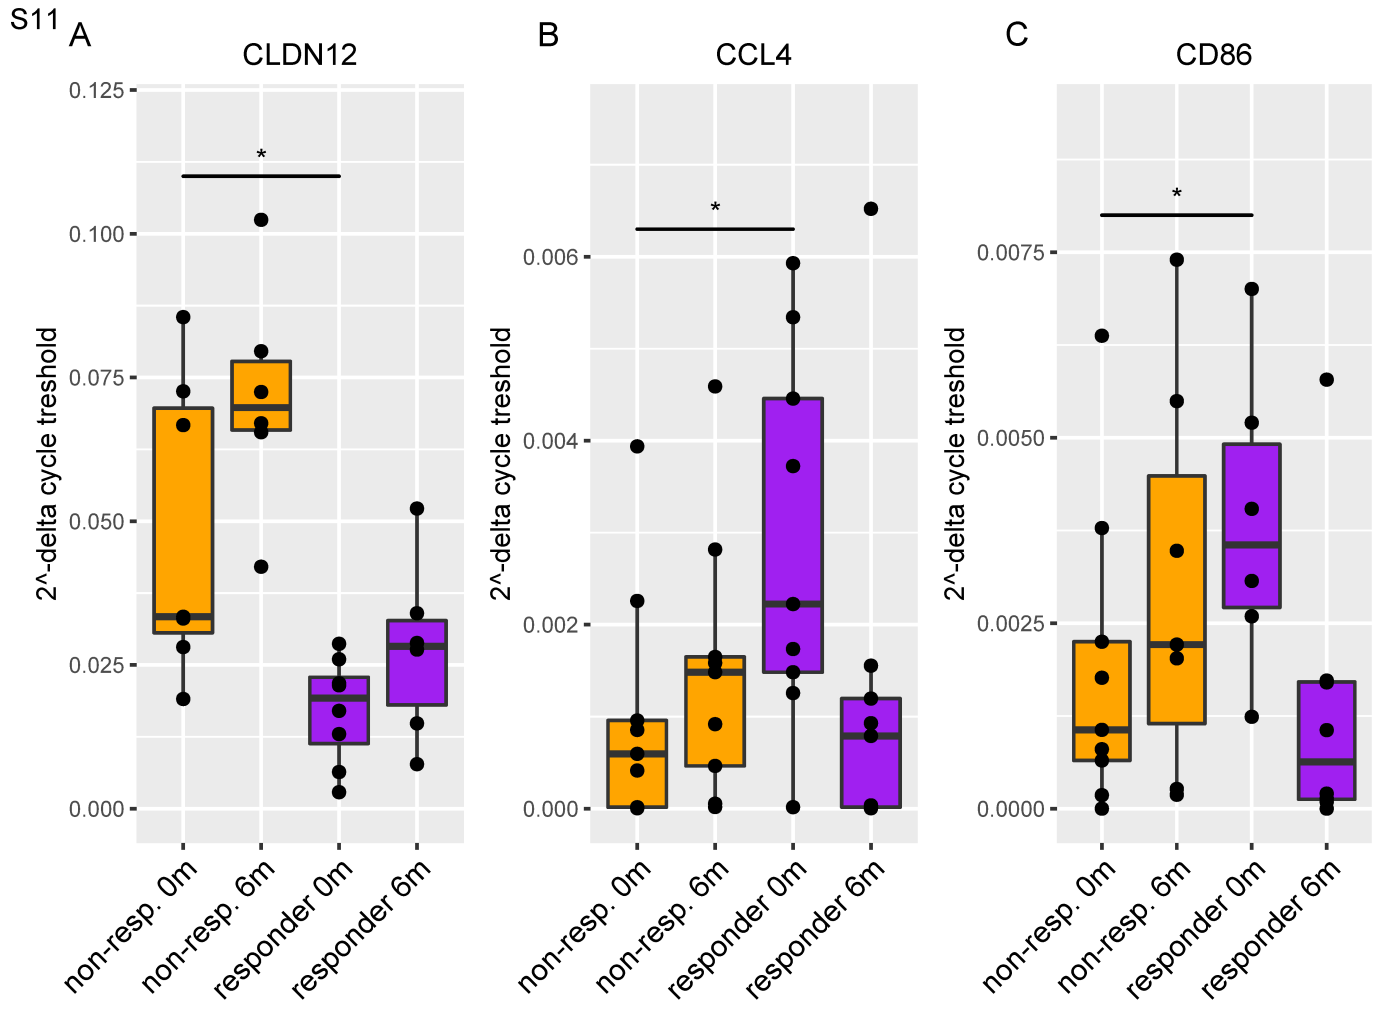

S12

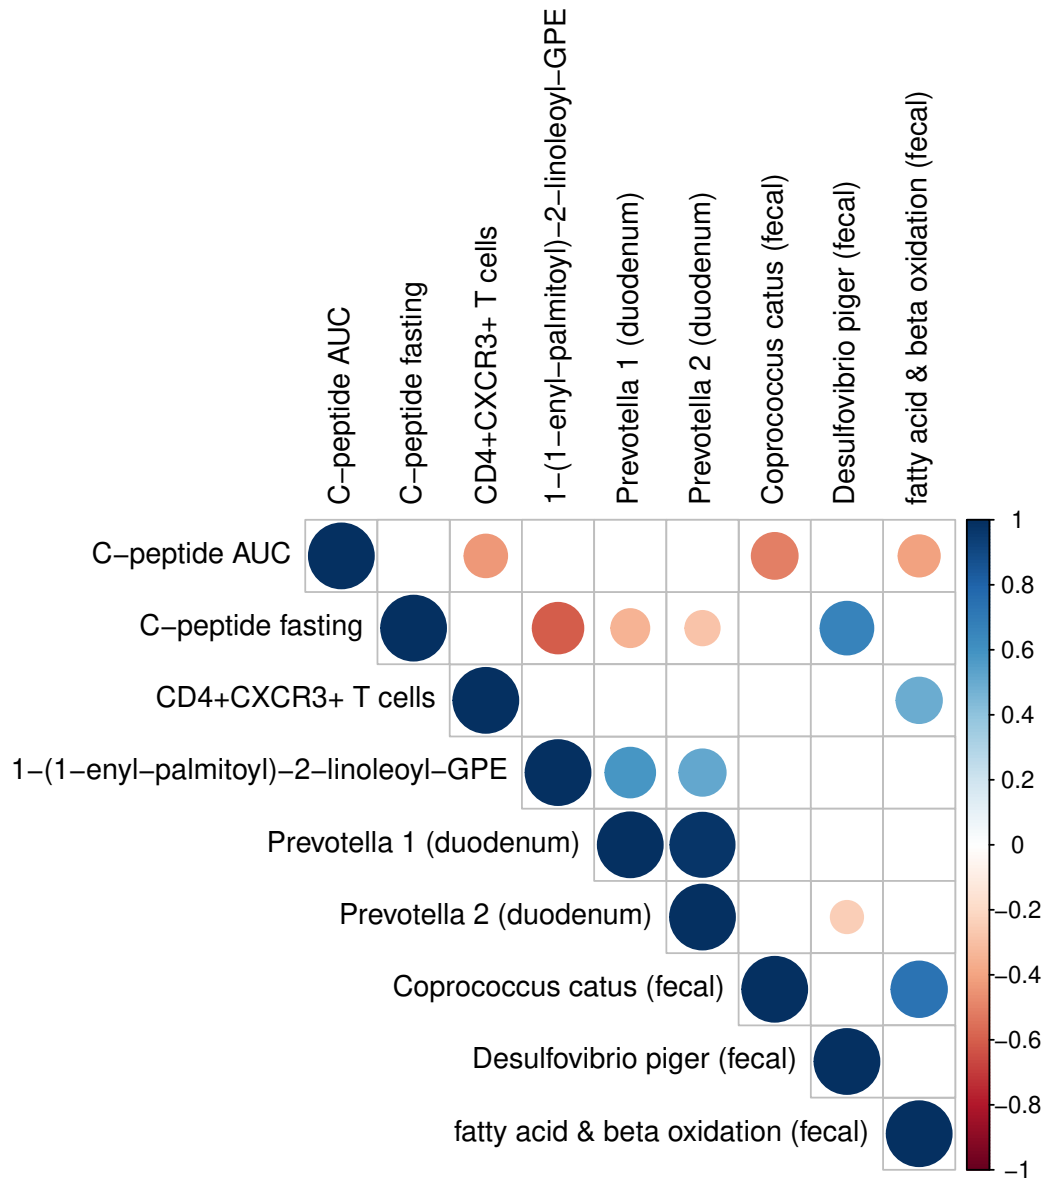

Supplement: gutjnl-2020-322630supp004_data_supplement.pdf [file gutjnl-2020-322630supp004_data_supplement.pdf]
