# Supplementary material for: Faecal microbiota transplantation halts progression of human new-onset type 1 diabetes in a randomised controlled trial
Source: HighWire-hosted journal article supplement (doi:10.1136/gutjnl-2020-322630), 2020-10-26
Supplement: gutjnl-2020-322630supp002_data_supplement.pdf [file gutjnl-2020-322630supp002_data_supplement.pdf]

Supplementary table 1

| GeneCard Cell Junctions<br>Gene code | Gene name                                  | Gene type    | GeneCard Inflammation<br>Gene code | Gene name                                                       | Gene type    |
|--------------------------------------|--------------------------------------------|--------------|------------------------------------|-----------------------------------------------------------------|--------------|
| GAPDH-Hs9999905_m1                   | glyceraldehyde-3-phosphate dehydrogenase   | housekeeping | GAPDH-Hs9999905_m1                 | glyceraldehyde-3-phosphate dehydrogenase                        | housekeeping |
| CAV1-Hs00971716_m1                   | caveolin 1                                 | target       | ACTB-Hs9999903_m1                  | actin beta                                                      | housekeeping |
| CAV2-Hs00184597_m1                   | caveolin 2                                 | target       | ALDO5-Hs00167336_m1                | arachidonate 5-lipoxygenase                                     | target       |
| CAV3-Hs00154292_m1                   | caveolin 3                                 | target       | B2M-Hs9999907_m1                   | beta-2-microglobulin                                            | housekeeping |
| CDH1-Hs01023894_m1                   | cadherin 1                                 | target       | HSPA5-Hs00607129_gH                | heat shock protein family A (Hsp70) member 5                    | target       |
| CDH2-Hs00898056_m1                   | cadherin 2                                 | target       | CARD9-Hs00364485_m1                | caspase recruitment domain family member 9                      | target       |
| CDN1-Hs00221623_m1                   | claudin 1                                  | target       | ACR2-Hs00174299_m1                 | atypical chemokine receptor 2                                   | target       |
| CDN10-Hs00734479_m1                  | claudin 10                                 | target       | CC11-Hs00237013_m1                 | C-C motif chemokine ligand 11                                   | target       |
| CDN11-Hs00194440_m1                  | claudin 11                                 | target       | CC13-Hs00234646_m1                 | C-C motif chemokine ligand 13                                   | target       |
| CDN12-Hs00273258_s1                  | claudin 12                                 | target       | CC15-CC14-CC115-Hs00263142_m1      | CC15-CC14, C-C motif chemokine ligand 15                        | target       |
| CDN14-Hs00273267_s1                  | claudin 14                                 | target       | CC16-Hs00171123_m1                 | C-C motif chemokine ligand 16                                   | target       |
| CDN15-Hs00204982_m1                  | claudin 15                                 | target       | CC17-Hs00171074_m1                 | C-C motif chemokine ligand 17                                   | target       |
| CDN16-Hs00107062_m1                  | claudin 16                                 | target       | CC18-Hs00268113_m1                 | C-C motif chemokine ligand 18                                   | target       |
| CDN17-Hs01043467_s1                  | claudin 17                                 | target       | CC19-Hs00171149_m1                 | C-C motif chemokine ligand 19                                   | target       |
| CDN18-Hs00212584_m1                  | claudin 18                                 | target       | CC19-Hs00171072_m1                 | C-C motif chemokine ligand 19                                   | target       |
| CDN19-Hs00963709_m1                  | claudin 19                                 | target       | CC2-Hs00234140_m1                  | C-C motif chemokine ligand 2                                    | target       |
| CDN2-Hs00232666_s1                   | claudin 2                                  | target       | CC20-Hs00171125_m1                 | C-C motif chemokine ligand 20                                   | target       |
| CDN3-Hs00265816_s1                   | claudin 3                                  | target       | CC21-Hs00171076_m1                 | C-C motif chemokine ligand 21                                   | target       |
| CDN4-Hs00978831_s1                   | claudin 4                                  | target       | CC22-Hs00171080_m1                 | C-C motif chemokine ligand 22                                   | target       |
| CDN5-Hs00253940_s1                   | claudin 5                                  | target       | CC25-Hs00171144_m1                 | C-C motif chemokine ligand 25                                   | target       |
| CDN6-Hs00607528_s1                   | claudin 6                                  | target       | CC26-Hs00171146_m1                 | C-C motif chemokine ligand 26                                   | target       |
| CDN7-Hs00600772_m1                   | claudin 7                                  | target       | UBC-Hs00824723_m1                  | ubiquitin C                                                     | housekeeping |
| CDN8-Hs00186769_s1                   | claudin 8                                  | target       | CC13-Hs00234142_m1                 | C-C motif chemokine ligand 3                                    | target       |
| CDN9-Hs00251134_s1                   | claudin 9                                  | target       | CC4-Hs00999146_m1                  | C-C motif chemokine ligand 4                                    | target       |
| DLL1-Hs00194509_m1                   | delta like canonical Notch ligand 1        | target       | CC5-Hs00174575_m1                  | C-C motif chemokine ligand 5                                    | target       |
| DSCL1-Hs00245189_m1                  | desmocollin 1                              | target       | CC7-Hs00171147_m1                  | C-C motif chemokine ligand 7                                    | target       |
| DSCL2-Hs00951428_m1                  | desmocollin 2                              | target       | CC8-Hs00271615_m1                  | C-C motif chemokine ligand 8                                    | target       |
| DSCL3-Hs00170032_m1                  | desmocollin 3                              | target       | CCR1-Hs00174296_m1                 | C-C motif chemokine receptor 1                                  | target       |
| DSCL4-Hs00355084_m1                  | desmocollin 4                              | target       | CCR3-Hs00356601_m1                 | C-C motif chemokine receptor 3                                  | target       |
| DSG2-Hs00170071_m1                   | desmoglein 2                               | target       | CCR3-Hs00266213_s1                 | C-C motif chemokine receptor 3                                  | target       |
| DSG3-Hs00951897_m1                   | desmoglein 3                               | target       | CCR4-Hs9999919_m1                  | C-C motif chemokine receptor 4                                  | target       |
| DSG4-Hs00698286_m1                   | desmoglein 4                               | target       | CCR5-Hs00129177_m1                 | C-C motif chemokine receptor 5                                  | target       |
| DSR-Hs00950501_m1                    | desmoplakin                                | target       | CCR6-Hs00171111_m1                 | C-C motif chemokine receptor 6                                  | target       |
| DST-Hs00156137_m1                    | dyostonin                                  | target       | CCR7-Hs00171054_m1                 | C-C motif chemokine receptor 7                                  | target       |
| ESAM-Hs00332781_m1                   | endothelial cell adhesion molecule         | target       | CCR8-Hs00174764_m1                 | C-C motif chemokine receptor 8                                  | target       |
| F11R-Hs00170991_m1                   | F11 receptor                               | target       | CD14-Hs00262149_s1                 | CD14 molecule                                                   | target       |
| GJA1-Hs00174845_s1                   | gap junction protein alpha 1               | target       | CD28-Hs00174142_m1                 | CD28 molecule                                                   | target       |
| GJA3-Hs00254296_s1                   | gap junction protein alpha 3               | target       | CD68-Hs00154355_m1                 | CD68 molecule                                                   | target       |
| GJA4-Hs00704917_s1                   | gap junction protein alpha 4               | target       | CD80-Hs01045161_m1                 | CD80 molecule                                                   | target       |
| GJA5-Hs00270952_s1                   | gap junction protein alpha 5               | target       | CD86-Hs00157026_m1                 | CD86 molecule                                                   | target       |
| GJB1-Hs00170980_m1                   | gap junction protein beta 1                | target       | CHGA-Hs00230973_m1                 | chromogranin A                                                  | target       |
| GJB2-Hs00269615_s1                   | gap junction protein beta 2                | target       | DIT3-Hs00358796_g1                 | DNA damage inducible transcript 3                               | target       |
| GJB3-Hs00278125_s1                   | gap junction protein beta 3                | target       | PTGS2-Hs00153133_m1                | prostaglandin-endoperoxide synthase 2                           | target       |
| GJB4-Hs00202016_s1                   | gap junction protein beta 4                | target       | CSF1-Hs00174164_m1                 | colony stimulating factor 1                                     | target       |
| GJB5-Hs01021450_s1                   | gap junction protein beta 5                | target       | CTLA4-Hs00174160_m1                | cytotoxic T-lymphocyte associated protein 4                     | target       |
| GJB6-Hs00922742_s1                   | gap junction protein beta 6                | target       | CXCL3-Hs00171086_m1                | C-X3-C motif chemokine ligand 1                                 | target       |
| GJC2-Hs00257113_m1                   | gap junction protein gamma 2               | target       | CXCR1-Hs00365842_m1                | C-X3-C motif chemokine receptor 1                               | target       |
| GJDB2-Hs00950432_m1                  | gap junction protein delta 2               | target       | CXCL10-Hs00171042_m1               | C-X-C motif chemokine ligand 10                                 | target       |
| GJC3-Hs011384570_m1                  | gap junction protein gamma 3               | target       | CXCL12-Hs00171022_m1               | C-X-C motif chemokine ligand 12                                 | target       |
| ICAM1-Hs00164932_m1                  | intercellular adhesion molecule 1          | target       | CXCL4-Hs00236937_m1                | C-X-C motif chemokine ligand 4                                  | target       |
| ICAM2-Hs00605663_m1                  | intercellular adhesion molecule 2          | target       | CXCL8-Hs00171065_m1                | C-X-C motif chemokine ligand 8                                  | target       |
| ITGA1-Hs00235006_m1                  | integrin subunit alpha 1                   | target       | CXCR1-Hs00174146_m1                | C-X-C motif chemokine receptor 1                                | target       |
| ITGA2-Hs00158127_m1                  | integrin subunit alpha 2                   | target       | CXCR2-Hs00174304_m1                | C-X-C motif chemokine receptor 2                                | target       |
| ITGA3-Hs01076873_m1                  | integrin subunit alpha 3                   | target       | CXCR3-Hs00171041_m1                | C-X-C motif chemokine receptor 3                                | target       |
| ITGA4-Hs00168433_m1                  | integrin subunit alpha 4                   | target       | CXCR4-Hs00237052_m1                | C-X-C motif chemokine receptor 4                                | target       |
| ITGA5-Hs01547673_m1                  | integrin subunit alpha 5                   | target       | CXCR6-Hs00174843_m1                | C-X-C motif chemokine receptor 6                                | target       |
| ITGA6-Hs01041011_m1                  | integrin subunit alpha 6                   | target       | ACKR3-Hs00604567_m1                | atypical chemokine receptor 3                                   | target       |
| ITGA7-Hs00174397_m1                  | integrin subunit alpha 7                   | target       | FCGR3B/FCGR3A-Hs00275547_m1        | Fc fragment of IgG receptor 3/beta 3 fragment of IgG receptor 3 | target       |
| ITGA8-Hs00233321_m1                  | integrin subunit alpha 8                   | target       | GAD2-Hs00609534_m1                 | glutamate decarboxylase 2                                       | target       |
| ITGA9-Hs00979865_m1                  | integrin subunit alpha 9                   | target       | HCK-Hs01067403_m1                  | HCK proto-oncogene, Src family tyrosine kinase                  | target       |
| ITGAL-Hs00158218_m1                  | integrin subunit alpha L                   | target       | PTPRN-Hs01090891_g1                | protein tyrosine phosphatase, receptor type N                   | target       |
| ITGAM-Hs00355885_m1                  | integrin subunit alpha M                   | target       | IDO1-Hs00914148_m1                 | indoleamine 2,3-dioxygenase 1                                   | target       |
| ITGAV-Hs00233808_m1                  | integrin subunit alpha V                   | target       | IFNG-Hs00174143_m1                 | interferon gamma                                                | target       |
| ITGB1-Hs00559595_m1                  | integrin subunit beta 1                    | target       | IL10-Hs00174086_m1                 | interleukin 10                                                  | target       |
| ITGB2-Hs00164957_m1                  | integrin subunit beta 2                    | target       | IL12A-Hs00168405_m1                | interleukin 12A                                                 | target       |
| ITGB3-Hs00010469_m1                  | integrin subunit beta 3                    | target       | RPLP0-Hs9999902_m1                 | ribosomal protein lateral stalk subunit P0                      | housekeeping |
| ITGB4-Hs00236216_m1                  | integrin subunit beta 4                    | target       | IL12B-Hs00233688_m1                | interleukin 12B                                                 | target       |
| ITGB5-Hs00174435_m1                  | integrin subunit beta 5                    | target       | IL15-Hs00542562_m1                 | interleukin 15                                                  | target       |
| ITGB6-Hs00168458_m1                  | integrin subunit beta 6                    | target       | IL15RA-Hs00542602_g1               | interleukin 15 receptor subunit alpha                           | target       |
| JAM2-Hs01102206_m1                   | junctional adhesion molecule 2             | target       | IL17A-Hs00174383_m1                | interleukin 17A                                                 | target       |
| JAM3-Hs00230289_m1                   | junctional adhesion molecule 3             | target       | IL18-Hs00951010_m1                 | interleukin 1 receptor type 1                                   | target       |
| JUP-Hs00158408_m1                    | junction plakoglobin                       | target       | IL18-Hs00174097_m1                 | interleukin 1 beta                                              | target       |
| NOTCH1-Hs01062014_m1                 | notch 1                                    | target       | IL2-Hs00174114_m1                  | interleukin 2                                                   | target       |
| NOTCH2-Hs01050702_m1                 | notch 2                                    | target       | IL22-Hs01574154_m1                 | interleukin 22                                                  | target       |
| NOTCH3-Hs01128541_m1                 | notch 3                                    | target       | IL4-Hs00174122_m1                  | interleukin 4                                                   | target       |
| NOTCH4-Hs00965889_m1                 | notch 4                                    | target       | IL4R-Hs00166237_m1                 | interleukin 4 receptor                                          | target       |
| OCLN-Hs00170162_m1                   | occludin                                   | target       | IL6-Hs00174131_m1                  | interleukin 6                                                   | target       |
| PLEC-Hs00356986_g1                   | plectin                                    | target       | CXCL8-Hs00174103_m1                | C-X-C motif chemokine ligand 8                                  | target       |
| NECTIN1-Hs01591978_m1                | nectin cell adhesion molecule 1            | target       | INS-Hs02741308_m1                  | insulin                                                         | target       |
| NECTIN2-Hs01071562_m1                | nectin cell adhesion molecule 2            | target       | IAG3-Hs00958444_g1                 | lymphocyte activating 3                                         | target       |
| NECTIN3-Hs00210043_m1                | nectin cell adhesion molecule 3            | target       | LST1-Hs00705788_s1                 | leukocyte specific transcript 1                                 | target       |
| TJP1-Hs0151561_m1                    | tight junction protein 1                   | target       | GITA-Hs00172106_m1                 | class II, major histocompatibility complex, transactivator      | target       |
| TJP2-Hs00910543_m1                   | tight junction protein 2                   | target       | MIF-Hs00235988_g1                  | macrophage migration inhibitory factor                          | target       |
| TJP3-Hs00274276_m1                   | tight junction protein 3                   | target       | NOD2-Hs00223394_m1                 | nucleotide binding oligomerization domain containing 2          | target       |
| HPRT1-Hs9999909_m1                   | hypoxanthine phosphoribosyltransferase 1   | housekeeping | NOX2-Hs00167257_m1                 | nitric oxide synthase 2                                         | target       |
| GUSB-Hs9999908_m1                    | glucuronidase beta                         | housekeeping | PDCD1-Hs01550088_m1                | programmed cell death 1                                         | target       |
| ACTB-Hs9999903_m1                    | actin beta                                 | housekeeping | CD274-Hs00202457_m1                | CD274 molecule                                                  | target       |
| B2M-Hs9999907_m1                     | beta-2-microglobulin                       | housekeeping | PTX3-Hs00173615_m1                 | platelet alpha 3                                                | target       |
| HMBS-Hs00609297_m1                   | hydroxymethylbilane synthase               | housekeeping | SIGIRR-Hs00223247_m1               | single Ig and TIR domain containing                             | target       |
| PCB6-Hs00183533_m1                   | imperin 8                                  | housekeeping | TMEM173-Hs00736955_g1              | transmembrane protein 173                                       | target       |
| PGL1-Hs9999906_m1                    | phosphoglycerate kinase 1                  | housekeeping | SYP-Hs00306531_m1                  | synaptophysin                                                   | target       |
| RPLP0-Hs9999902_m1                   | ribosomal protein lateral stalk subunit P0 | housekeeping | TNF-Hs01741422_m1                  | tumor necrosis factor                                           | target       |
| TBP-Hs9999910_m1                     | TATA-box binding protein                   | housekeeping | TSPAN7-Hs00190284_m1               | tetraspanin 7                                                   | target       |
| TFR1-Hs9999911_m1                    | transferrin receptor                       | housekeeping | VEGFA-Hs00900054_m1                | vascular endothelial growth factor A                            | target       |
| UBC-Hs00824723_m1                    | ubiquitin C                                | housekeeping | CDorf54-Hs00735289_m1              | chromosome 10 open reading frame 54                             | target       |
|                                      |                                            |              | KCNJ8-Hs00958961_m1                | potassium voltage-gated channel subfamily 1 member 8            | target       |
