# Supplementary material for: Faecal microbiota transplantation halts progression of human new-onset type 1 diabetes in a randomised controlled trial
Source: PubMed Central journal article supplement (PMC7788262; doi:10.1136/gutjnl-2020-322630), 2020-10-26
Supplement: gutjnl-2020-322630supp003.pdf [file gutjnl-2020-322630supp003.pdf]

| Parameter                           | Groups    | Delta or baseline | AUC $\pm$ CI    | 1st most predictive variable                 | 2nd                                  | 3rd                                                                        |
|-------------------------------------|-----------|-------------------|-----------------|----------------------------------------------|--------------------------------------|----------------------------------------------------------------------------|
| Metabolites                         | Tx groups | $\Delta$ 0 – 12M  | 0.79 $\pm$ 0.23 | 1-myristoyl-2-arachidonoyl-GPC               | 1-(1-enyl-palmitoyl)-2-linoleoyl-GPE | 1-arachidonoyl-GPC                                                         |
|                                     | R12       | Baseline          | 0.70 $\pm$ 0.28 | 7-hydroxyoctanoate                           | N-acetylphenylalanine                | 2-methylcitrate/homocitrate                                                |
|                                     |           | $\Delta$ 0 – 12M  | 0.74 $\pm$ 0.25 | 7-hydroxyoctanoate                           | 14 or 15-methylpalmitate             | 5-methylthioadenosine                                                      |
| Small intestinal microbes           | Tx groups | $\Delta$ 0 – 12M  | 0.89 $\pm$ 0.18 | Prevotella 1                                 | Prevotella 2                         | Streptococcus oralis                                                       |
|                                     | R12       | Baseline          | 0.72 $\pm$ 0.27 | Undibacterium oligocarboniphilum             | Nesterenkonia flava                  | Shewanella colwelliana                                                     |
|                                     |           | $\Delta$ 0 – 6M   | 0.60 $\pm$ 0.29 | Neisseria animalis                           | Tenuibacillus multivorans            | Streptococcus mitis                                                        |
| Fecal microbes (taxonomy)           | Tx groups | $\Delta$ 0 – 6M   | 0.58 $\pm$ 0.24 | Desulfovibrio piger                          | Bacteroidales bacterium ph8          | Ruminococcus callidus                                                      |
|                                     |           | $\Delta$ 0 – 12M  | 0.72 $\pm$ 0.24 | Desulfovibrio piger                          | Eubacterium ventriosum               | Sutterella wadsworthensis                                                  |
|                                     | R12       | Baseline          | 0.93 $\pm$ 0.14 | Coprococcus catus                            | Bacteroides caccae                   | Paraprevotella unclassified                                                |
|                                     |           | $\Delta$ 0 – 6M   | 0.78 $\pm$ 0.23 | Lachnospiraceae bacterium 8 1 57FAA          | Collinsella aerofaciens              | Holdemania unclassified                                                    |
|                                     |           | $\Delta$ 0 – 12M  | 0.76 $\pm$ 0.23 | Bacteroidales bacterium ph8                  | Actinomyces viscosus                 | Bacteroides thetaiotaomicron                                               |
| Fecal microbes (metabolic pathways) | Tx groups | $\Delta$ 0 – 6M   | 0.75 $\pm$ 0.24 | GDP-mannose biosynthesis                     | dTDP-L-rhamnose biosynthesis I       | seleno-amino acid biosynthesis                                             |
|                                     |           | $\Delta$ 0 – 12M  | 0.68 $\pm$ 0.27 | seleno-amino acid biosynthesis               | UMP biosynthesis                     | superpathway of UDP-glucose-derived O-antigen building blocks biosynthesis |
|                                     | R12       | Baseline          | 0.85 $\pm$ 0.22 | fatty acid &beta;-oxidation I                | pyruvate fermentation to acetone     | colanic acid building blocks biosynthesis                                  |
|                                     |           | $\Delta$ 0 – 6M   | 0.70 $\pm$ 0.27 | glycogen biosynthesis I (from ADP-D-Glucose) | phosphatidylcholine acyl editing     | L-lysine biosynthesis II                                                   |
|                                     |           | $\Delta$ 0 – 12M  | 0.69 $\pm$ 0.22 | creatinine degradation I                     | Bifidobacterium shunt                | glycolysis III (from glucose)                                              |
| Duodenal gene expression            | Tx groups | $\Delta$ 0 – 6M   | 0.61 $\pm$ 0.24 | CCL18                                        | CXCR1                                | CXCR4                                                                      |
|                                     | R12       | Baseline          | 0.83 $\pm$ 0.21 | CCL22                                        | CLDN12                               | CCL4                                                                       |
|                                     |           | $\Delta$ 0 – 6M   | 0.73 $\pm$ 0.24 | CCR5                                         | CCL18                                | CD14                                                                       |

Supplementary table 2: AUCs. This table provides an overview of all predictive modeling analyses that we have performed. It shows what parameter was studied, in which group the analysis was done, whether baseline or delta values were used, how well the predictive model performed (measured as AUROC) and what were the top 3 predictive parameters from that analysis. The highest AUC from each category in bold. Tx: treatment, R12: responders versus non-responders at 12 months, Baseline: for this analysis, the baseline value of the parameters were used,  $\Delta$  0 – 12M: for this analysis, the delta's between baseline and 12 months were used. AUROC: area under the receiver-operator curve  $\pm$  confidence interval.
