# Supplementary material for: Faecal microbiota transplantation halts progression of human new-onset type 1 diabetes in a randomised controlled trial
Source: HighWire-hosted journal article supplement (doi:10.1136/gutjnl-2020-322630), 2020-10-26
Supplement: gutjnl-2020-322630supp005_data_supplement.pdf [file gutjnl-2020-322630supp005_data_supplement.pdf]

| Cell type                    | Autologous (n=10) | Allogenic (N=10) | P value |
|------------------------------|-------------------|------------------|---------|
| Dendritic cells              | 17123             | 14529            | 0.07    |
| Total monocytes              | 119555            | 73615            | 0.39    |
| CD16 pos monocytes           | 7395              | 5539             | 0.07    |
| CD14 pos monocytes           | 93804             | 72016            | 0.44    |
| B cells                      | 105975            | 172553           | 0.22    |
| Naive B                      | 61851             | 105175           | 0.22    |
| non CS memory B              | 21187             | 20716            | 0.39    |
| Transitional B               | 4463              | 3089             | 0.07    |
| CS memory B                  | 16577             | 21048            | 0.30    |
| plasmablasts and plasmacells | 3548              | 2826             | 0.07    |
| NK cells                     | 112375            | 123638           | 0.75    |
| CD16 pos NK                  | 95077             | 94477            | 0.82    |
| CD56 NK                      | 12090             | 18402            | 0.62    |
| NKT cells                    | 11571             | 11847            | 0.69    |
| T cells                      | 629591            | 588006           | 0.44    |
| CD4 T pos cells              | 251710            | 228152           | 0.39    |
| CD4 pos Naive T cells        | 120264            | 63899            | 1.00    |
| CD4 pos CM                   | 73353             | 46334            | 0.62    |
| CD4 pos EM                   | 36782             | 59531            | 0.75    |
| CD4 TEMRA                    | 7228              | 4172             | 0.50    |
| CD4 pos B7 pos               | 5262              | 3544             | 0.34    |
| CD4 pos CCR5 pos             | 11380             | 10425            | 0.15    |
| CD4 CXCR3                    | 39267             | 24162            | 0.06    |
| CD8 pos                      | 85578             | 67805            | 0.96    |
| CD8 pos Naive                | 49335             | 28281            | 0.13    |
| CD8 pos CM                   | 7266              | 6906             | 0.34    |
| CD8 pos EM                   | 14732             | 6080             | 0.16    |
| CD8 TEMRA                    | 7688              | 5519             | 0.39    |
| CD8 pos B7 pos               | 2413              | 1091             | 0.09    |
| CD8 pos CCR5 pos             | 5141              | 3240             | 0.77    |
| CD8 CXCR3                    | 9237              | 3039             | 0.89    |
| nTreg                        | 8005              | 6190             | 0.30    |
| Treg B7 pos                  | 1070              | 339              | 0.96    |
| Treg CCR5 pos                | 969               | 319              | 0.75    |
| Treg CXCR3                   | 847               | 303              | 0.62    |

Supplementary table 3: Number of Whole blood immune cells per group at baseline. p-values were calculated using Mann-Whitney U test.
